# Supplementary material for: A SNP Based High-Density Linkage Map of Apis cerana Reveals a High Recombination Rate Similar to Apis mellifera
Source: PubMed Central journal article supplement (PMC3794977; doi:10.1371/journal.pone.0076459), 2013-10-10

1 [1]

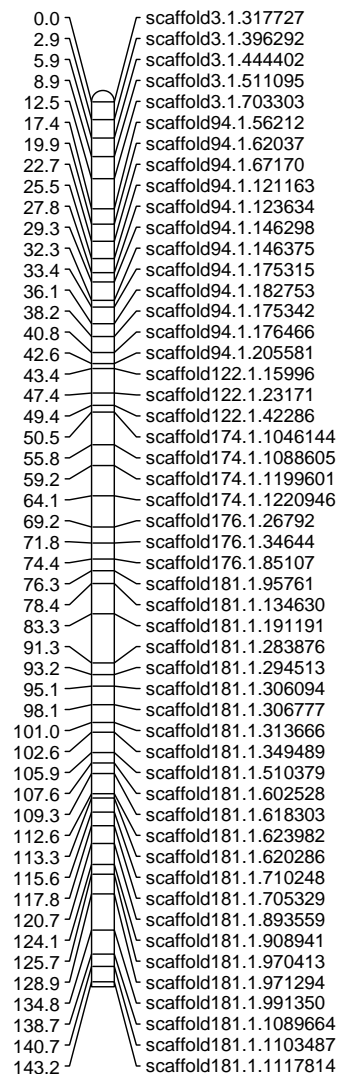

1 [2]

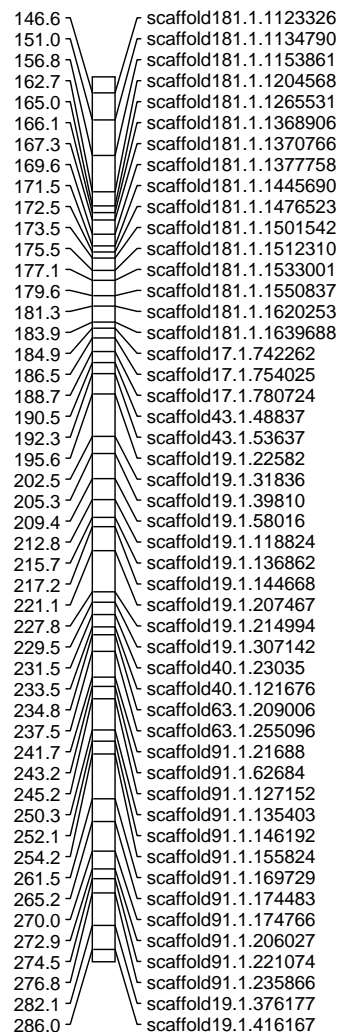

1 [3]

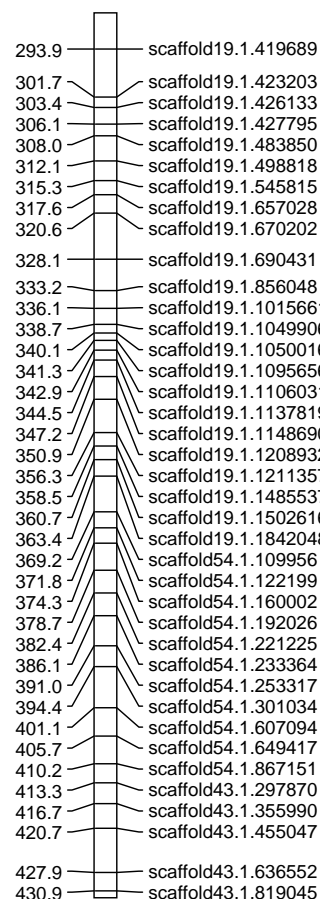

1 [4]

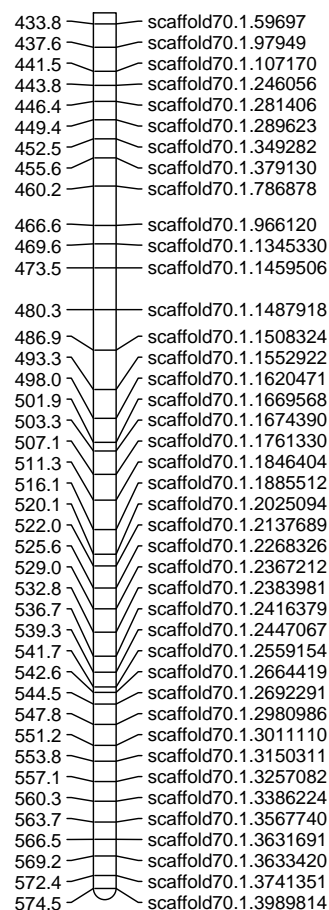

## 2 [1]

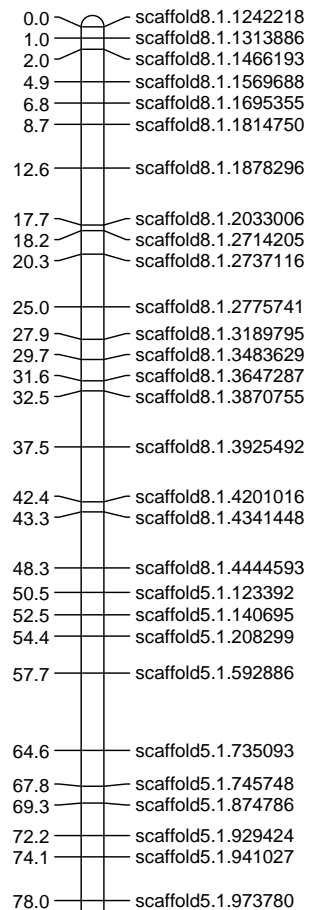

## 2 [2]

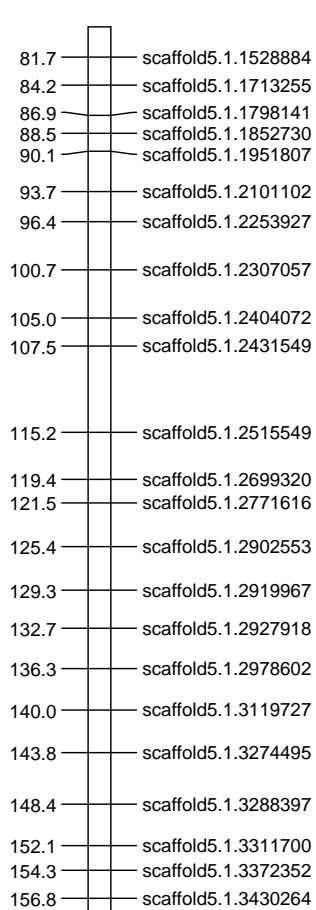

## 2 [3]

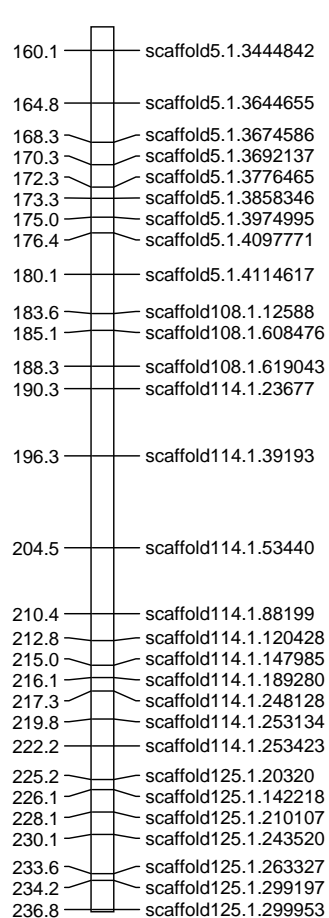

## 2 [4]

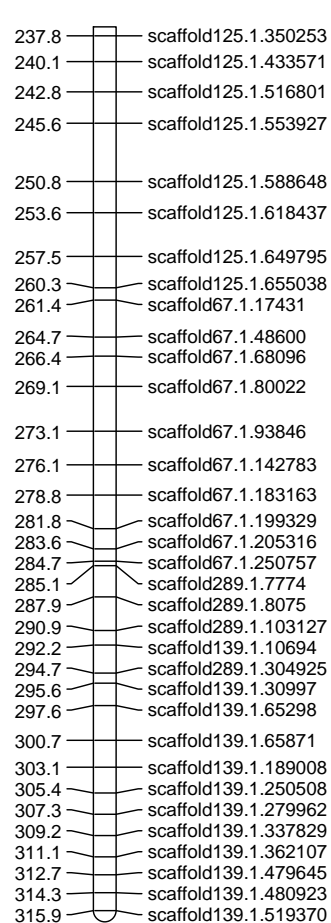

3 [1]

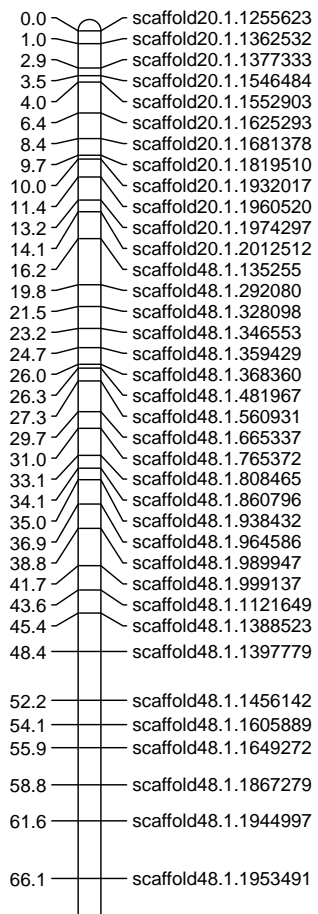

3 [2]

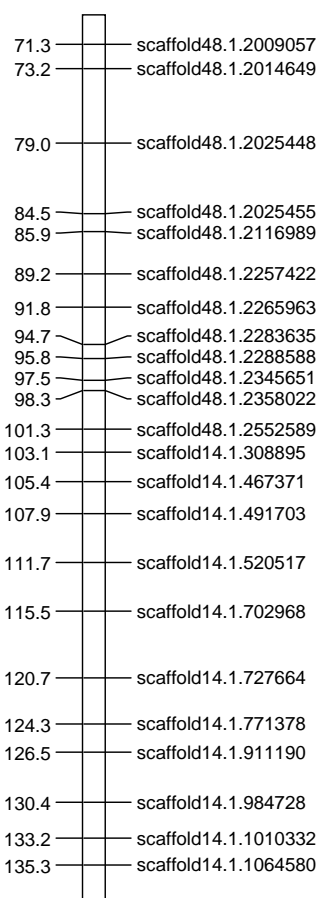

3 [3]

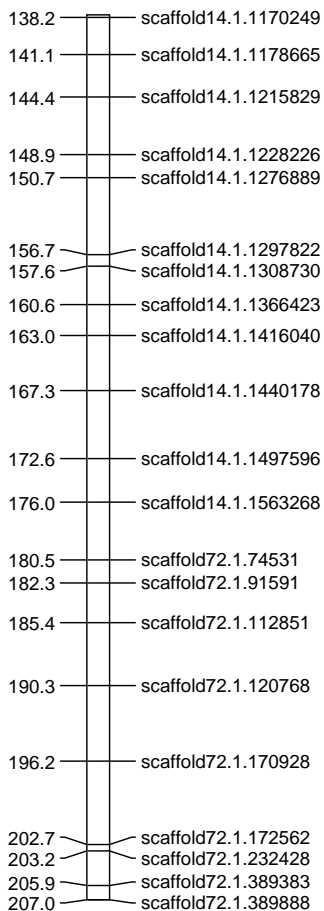

3 [4]

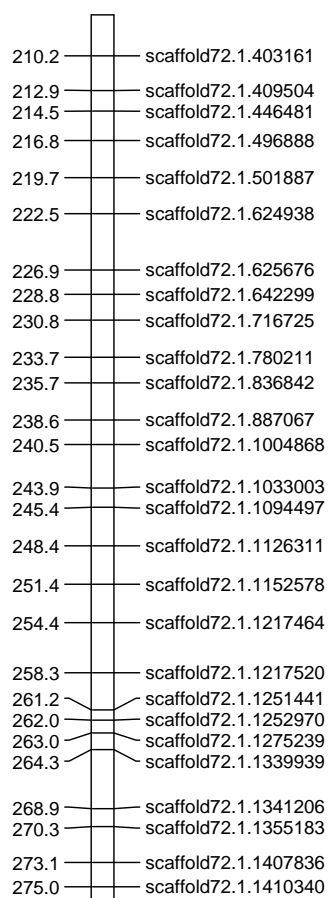

3 [5]

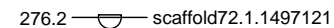

4 [1]

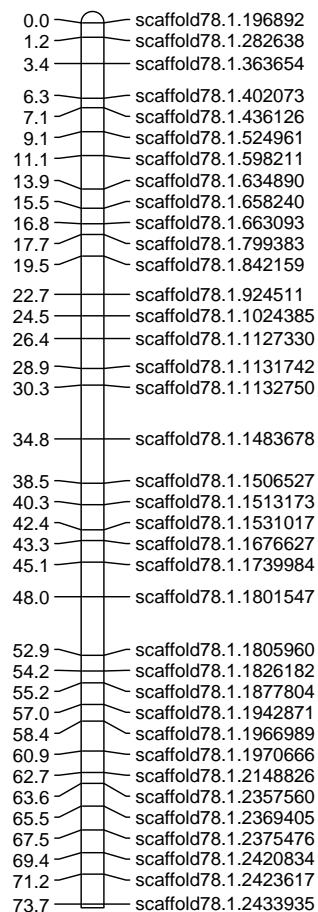

4 [2]

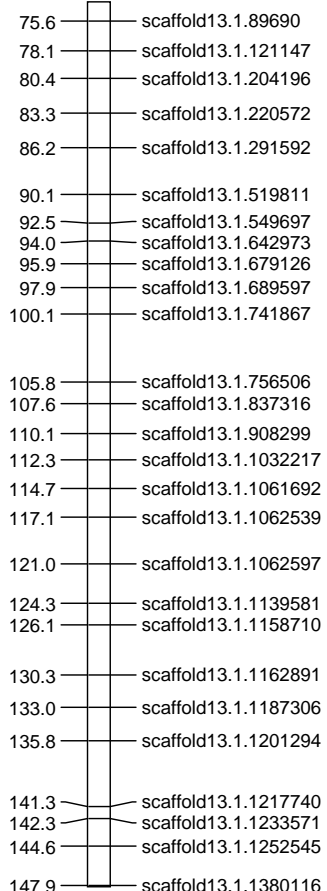

4 [3]

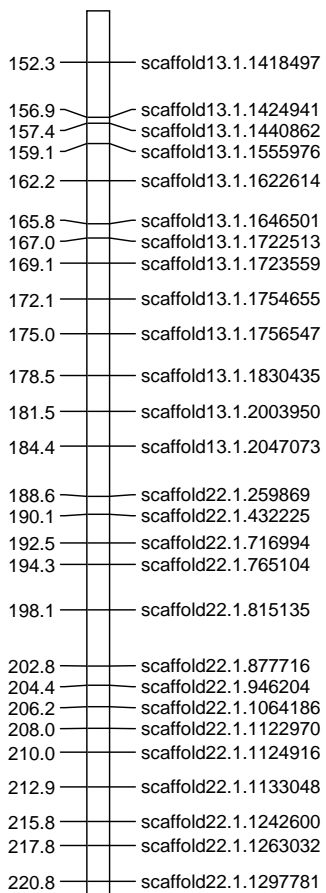

4 [4]

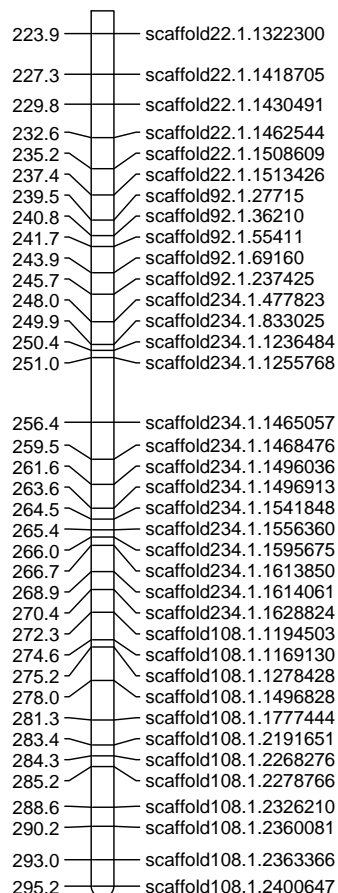

5 [1]

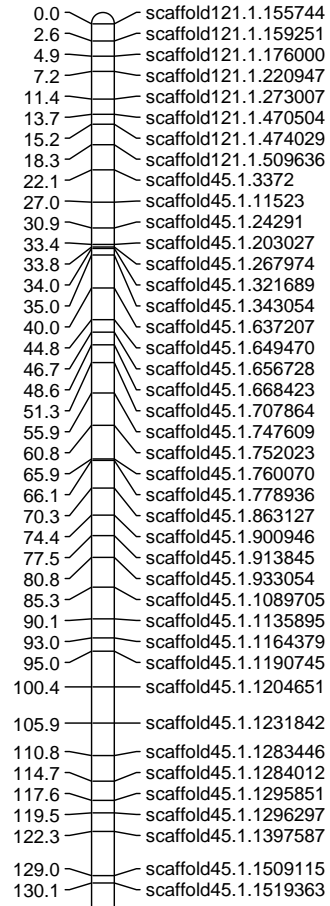

5 [2]

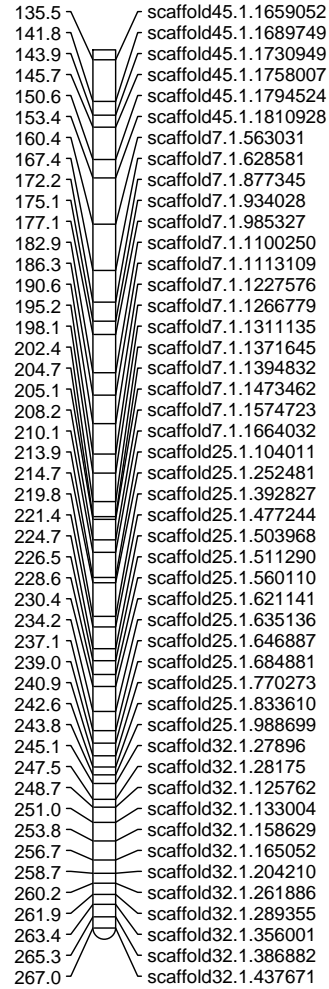

6 [1]

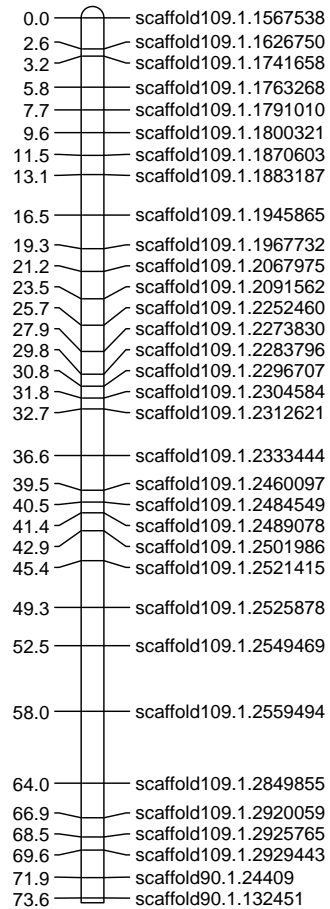

6 [2]

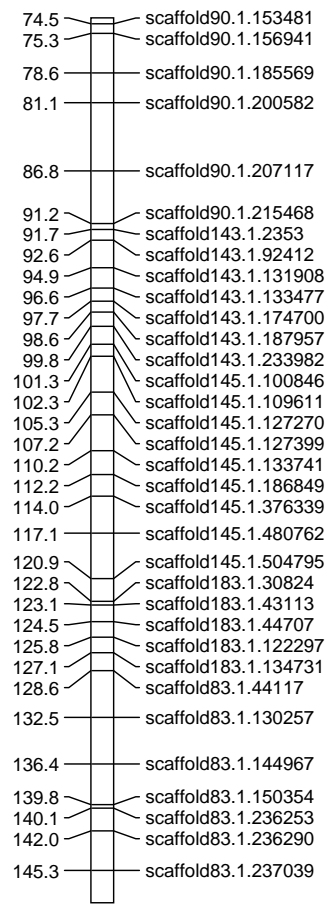

6 [3]

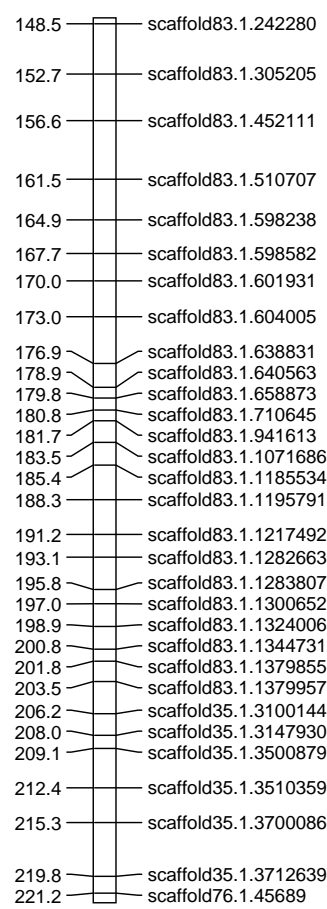

6 [4]

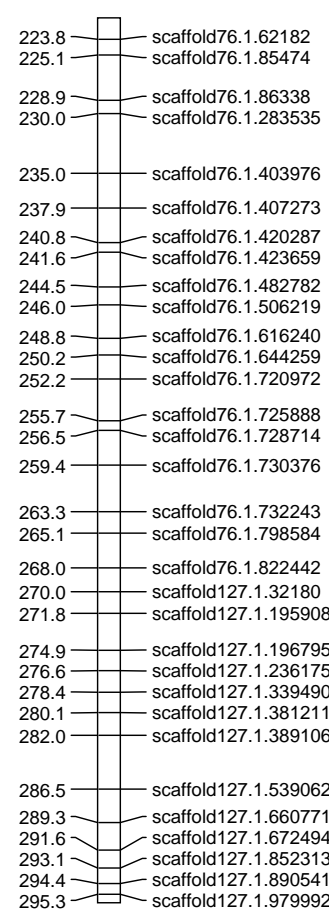

6 [5]

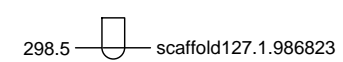

7 [1]

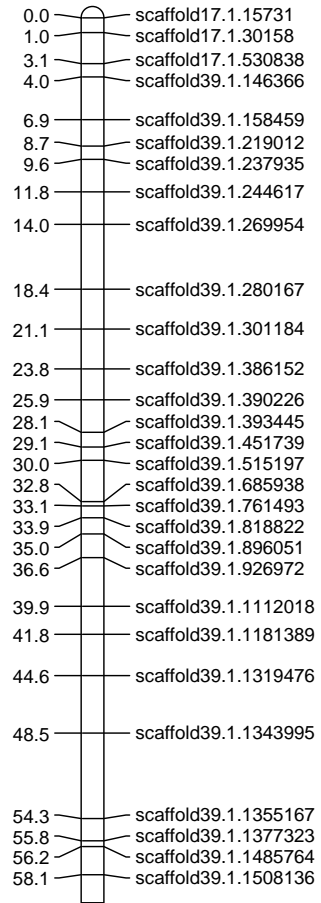

7 [2]

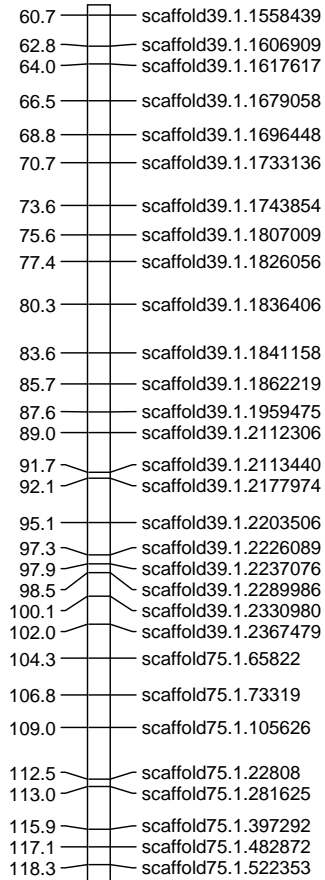

7 [3]

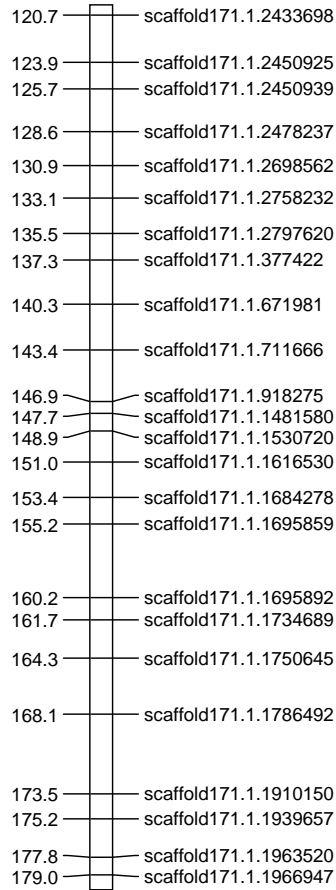

7 [4]

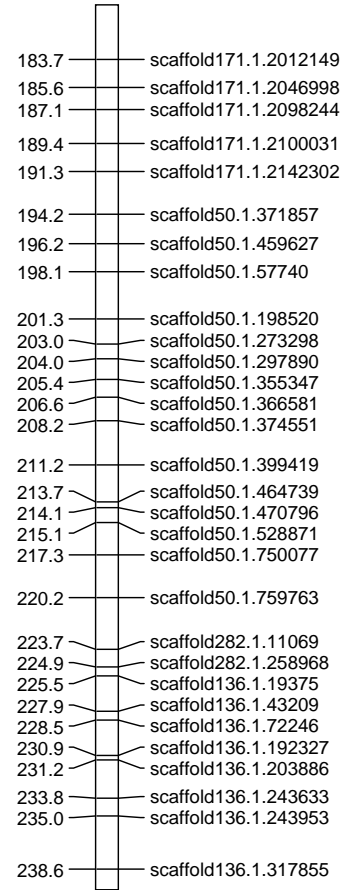

7 [5]

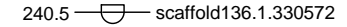

8 [1]

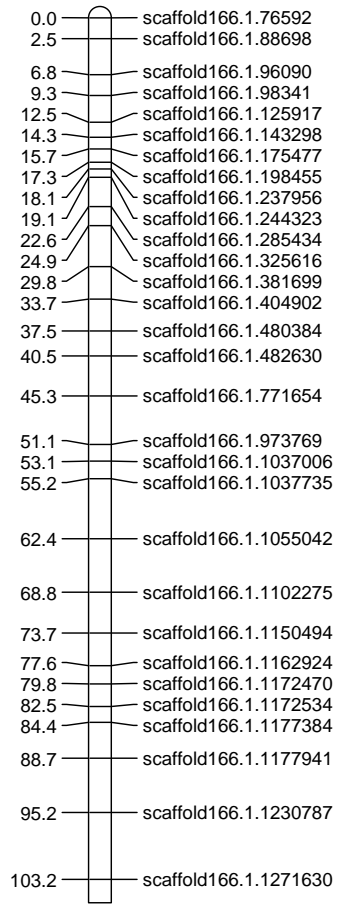

8 [2]

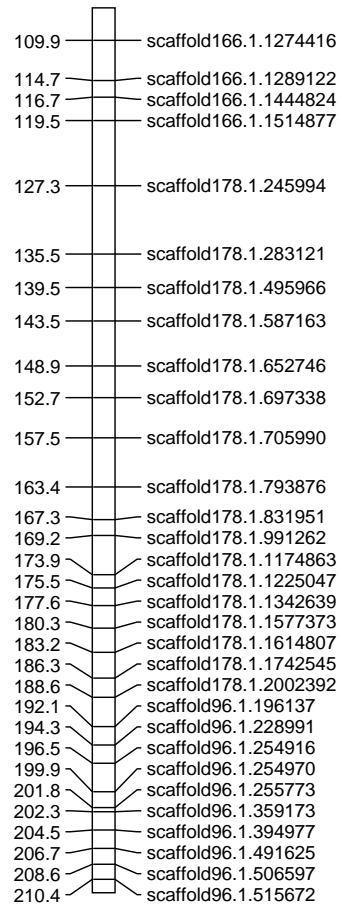

8 [3]

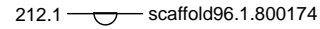



9 [1]

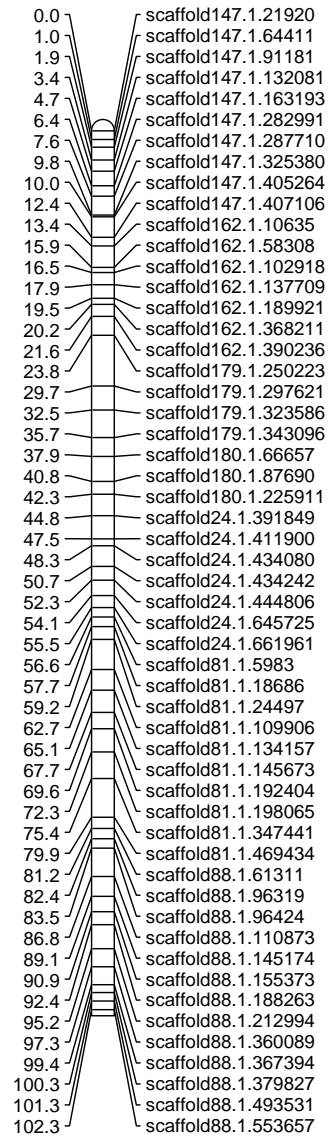

9 [2]

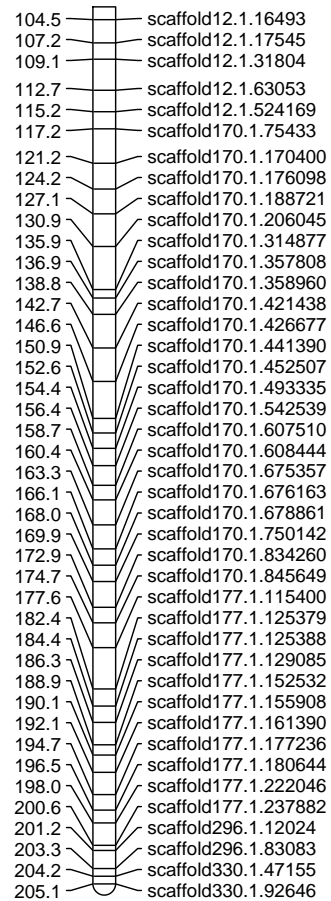

10 [1]

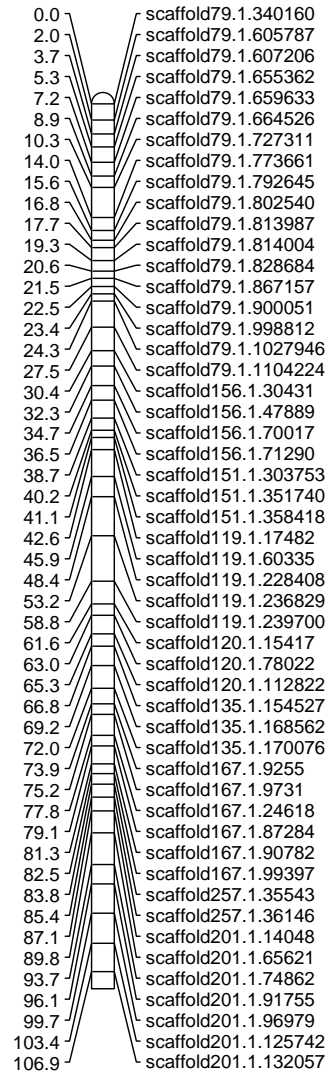

10 [2]

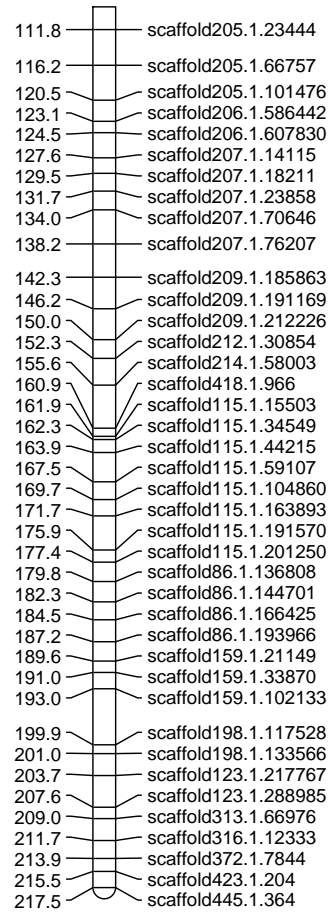

11 [1]

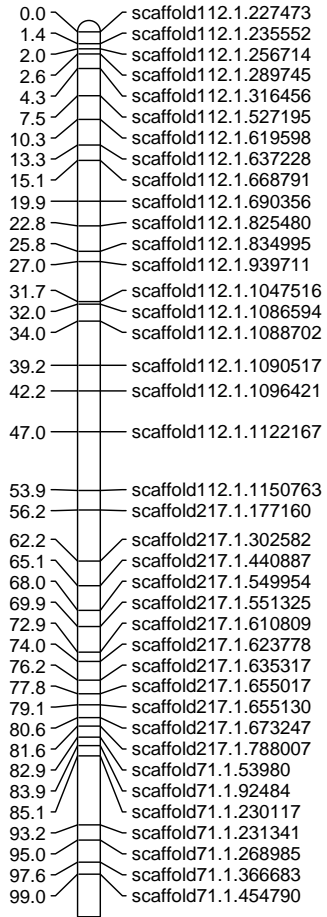

11 [2]

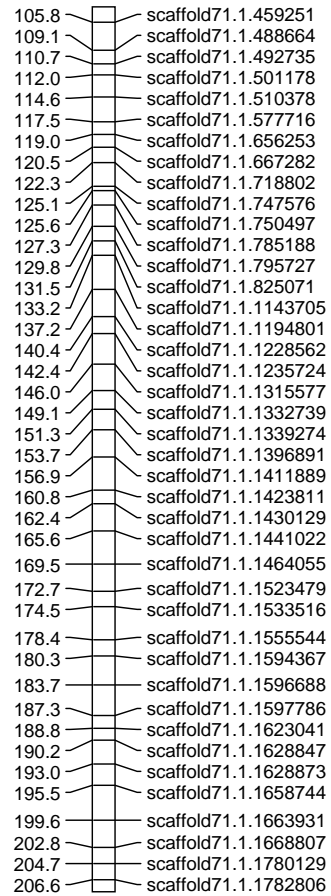

11 [3]

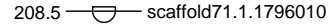

12 [1]

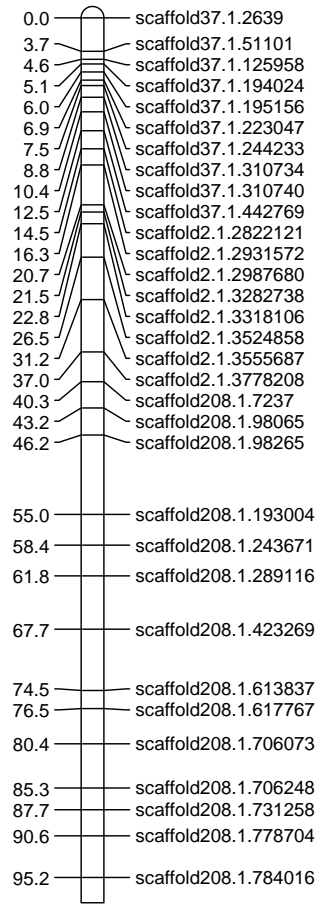

12 [2]

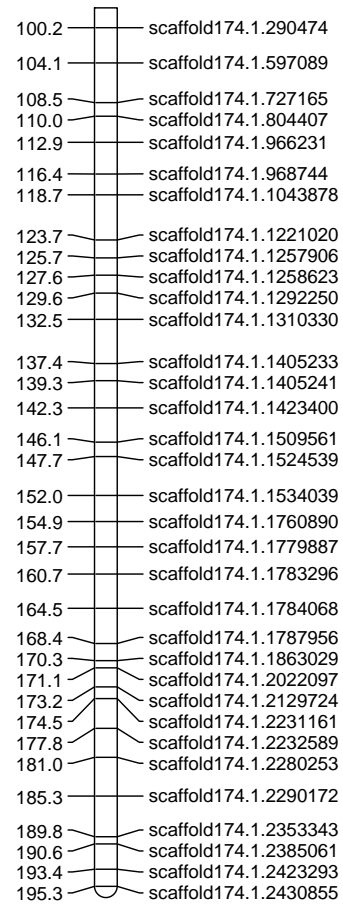

13 [1]

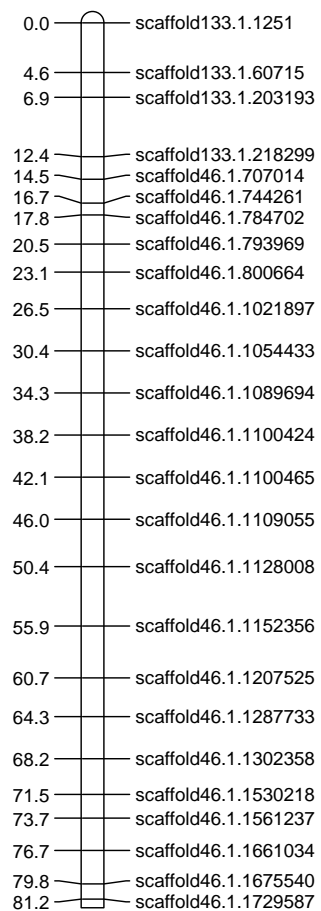

13 [2]

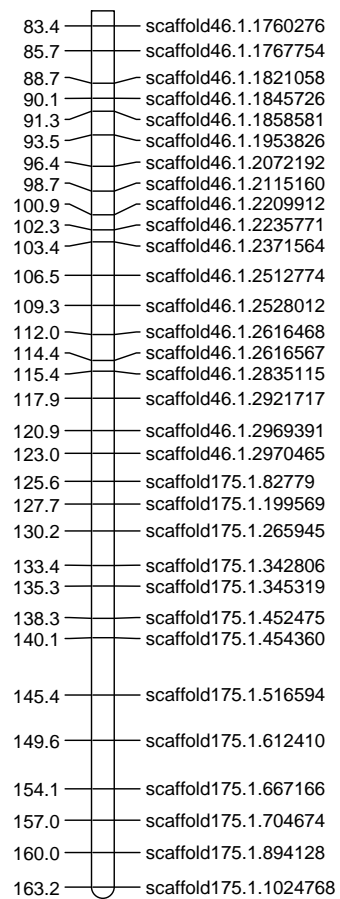

14 [1]

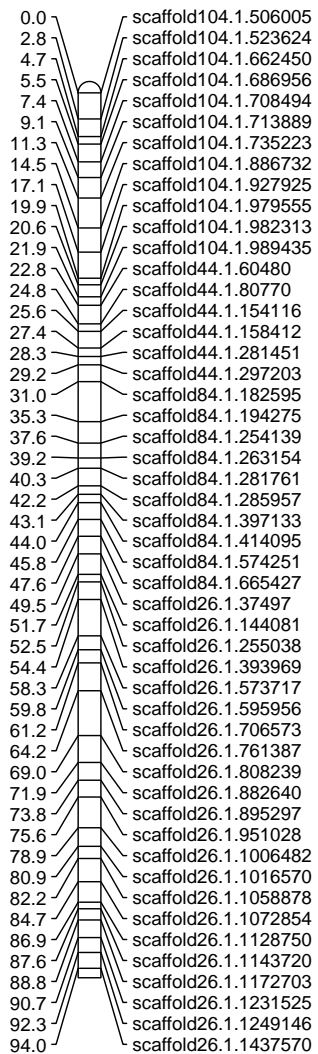

14 [2]

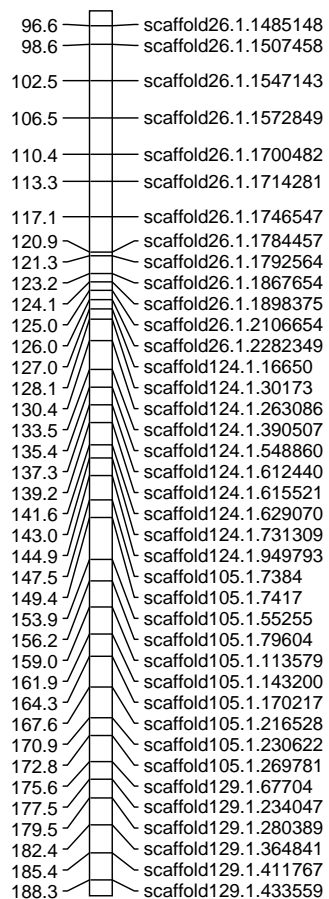

14 [3]

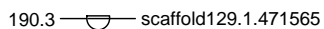

15 [1]

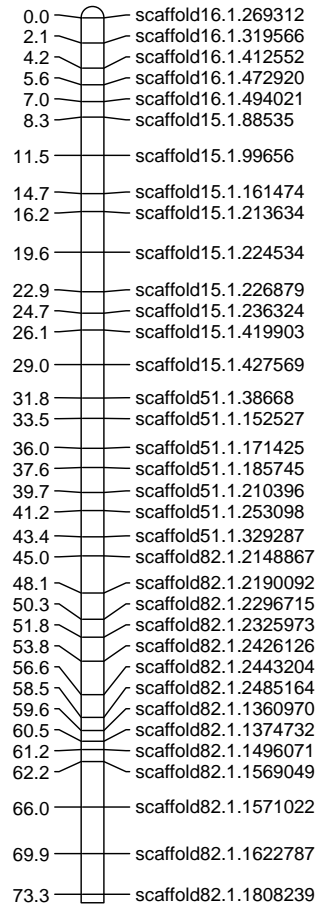

15 [2]

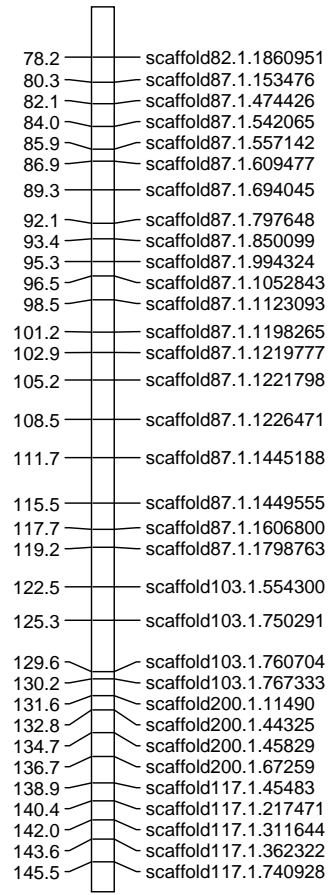

15 [3]

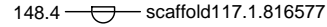

16 [1]

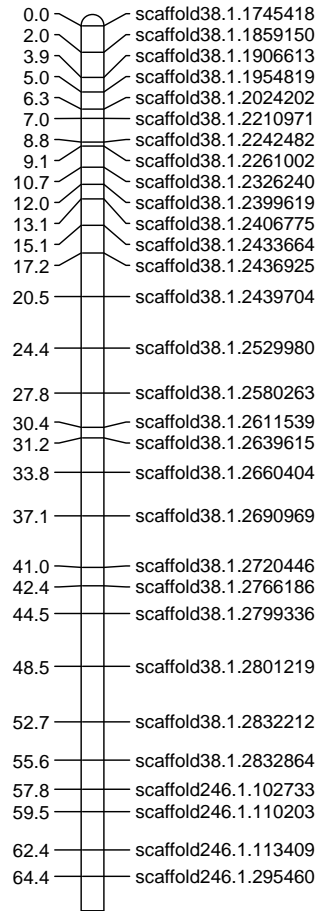

16 [2]

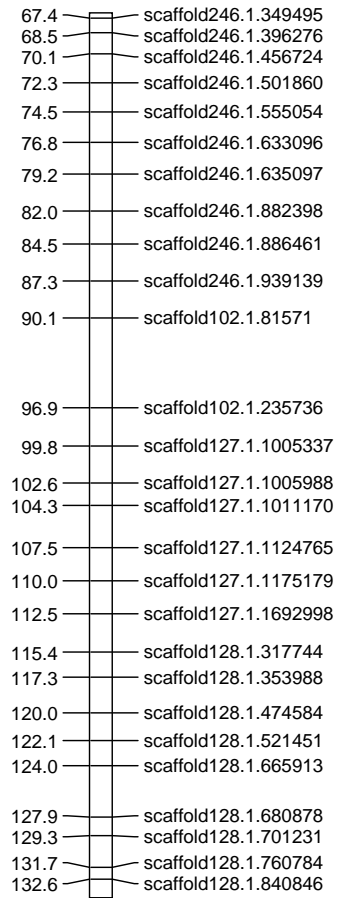

16 [3]

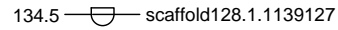

Supplement: pone.0076459.s001.pdf [file pone.0076459.s001.pdf]
